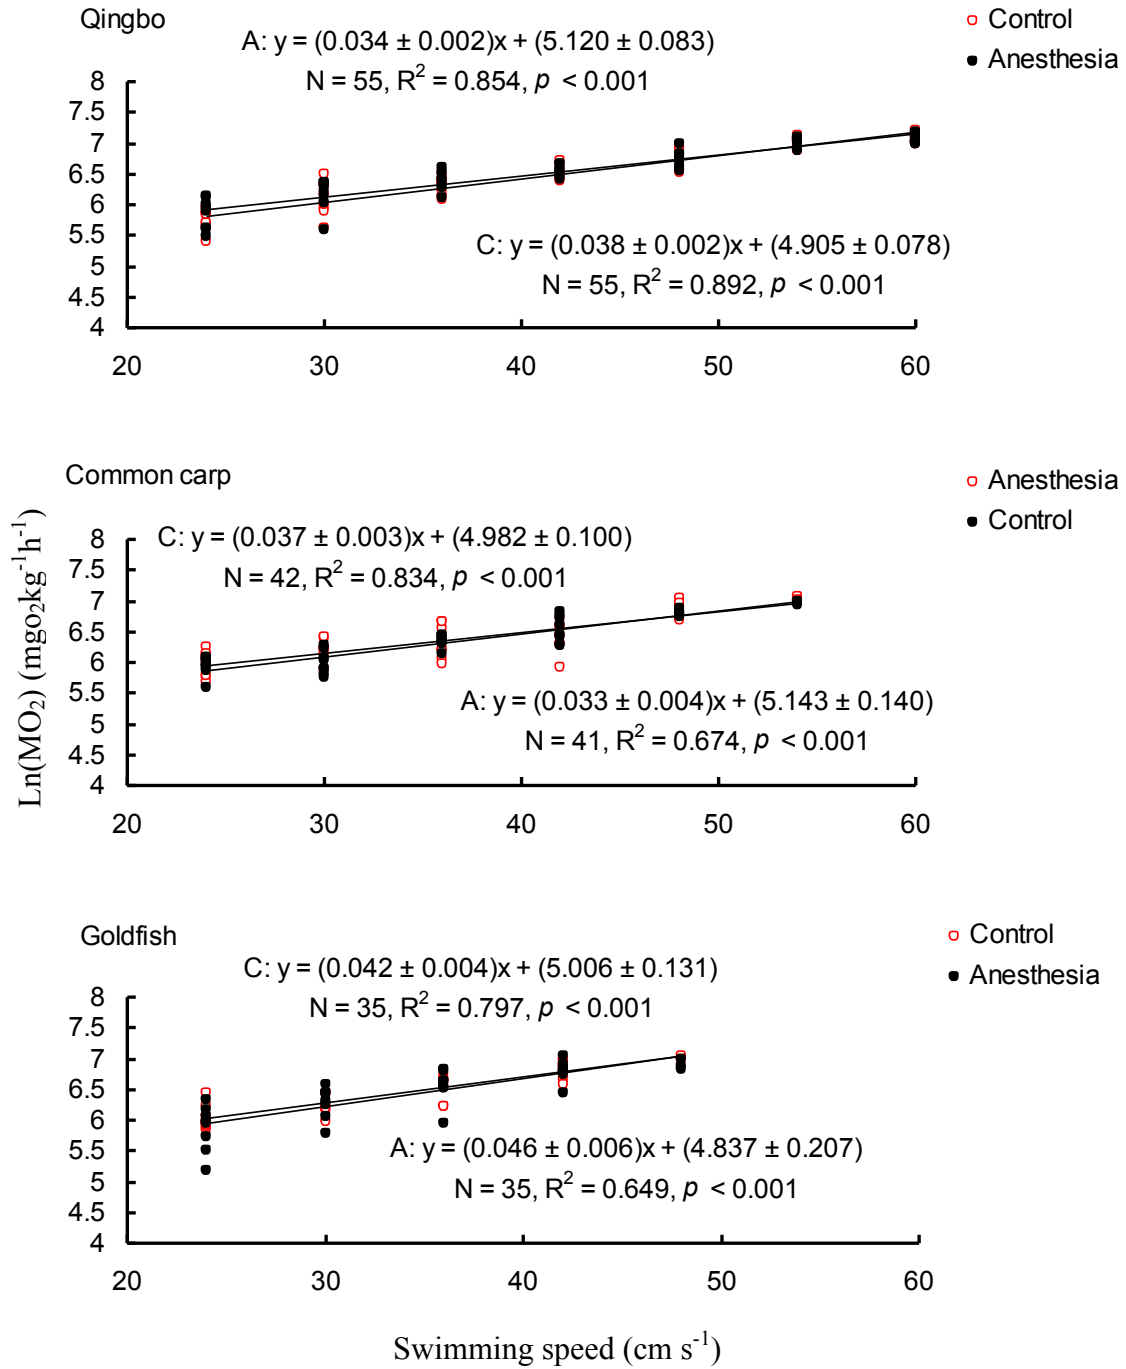

Fig. S1. The oxygen consumption rate of fish in anesthesia (filled circle ●;) and control (open circle ○) groups of qingbo, common carp and goldfish.

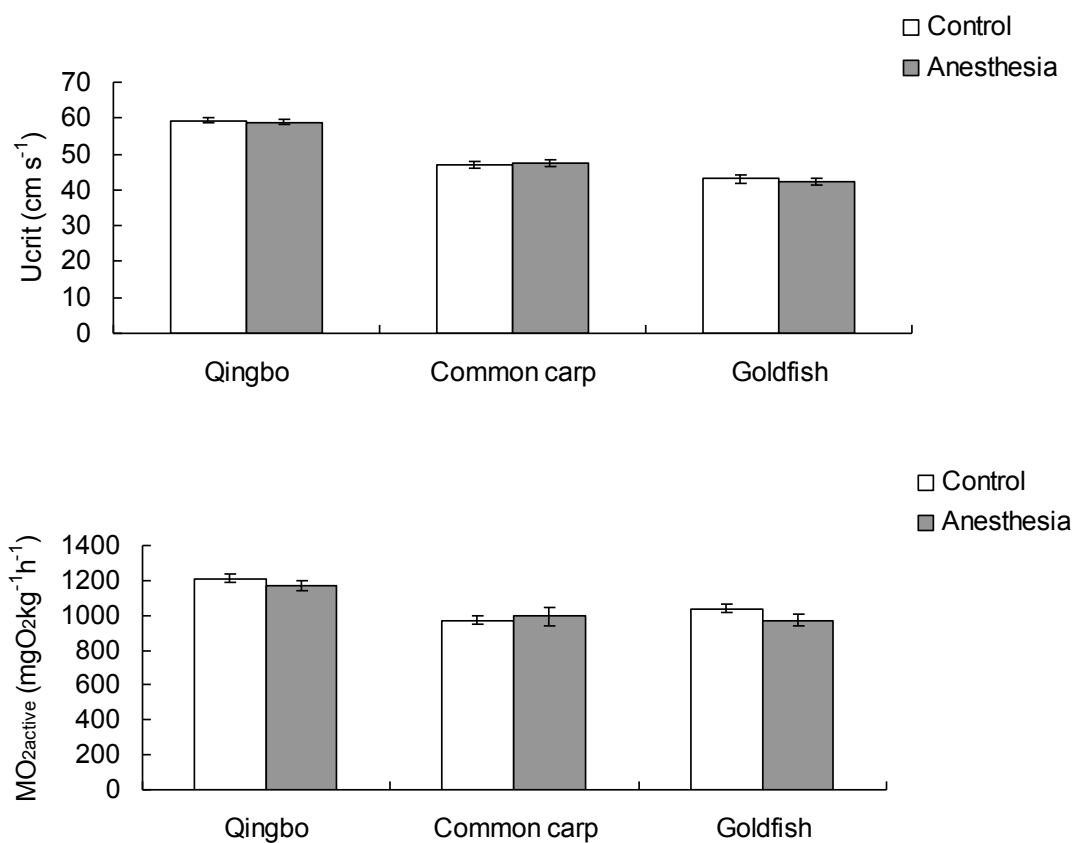

Fig. S2. The critical swimming speed and max metabolic rate of fish in control (open bars □) and anesthesia (filled bars ■) groups of qingbo, common carp and goldfish.

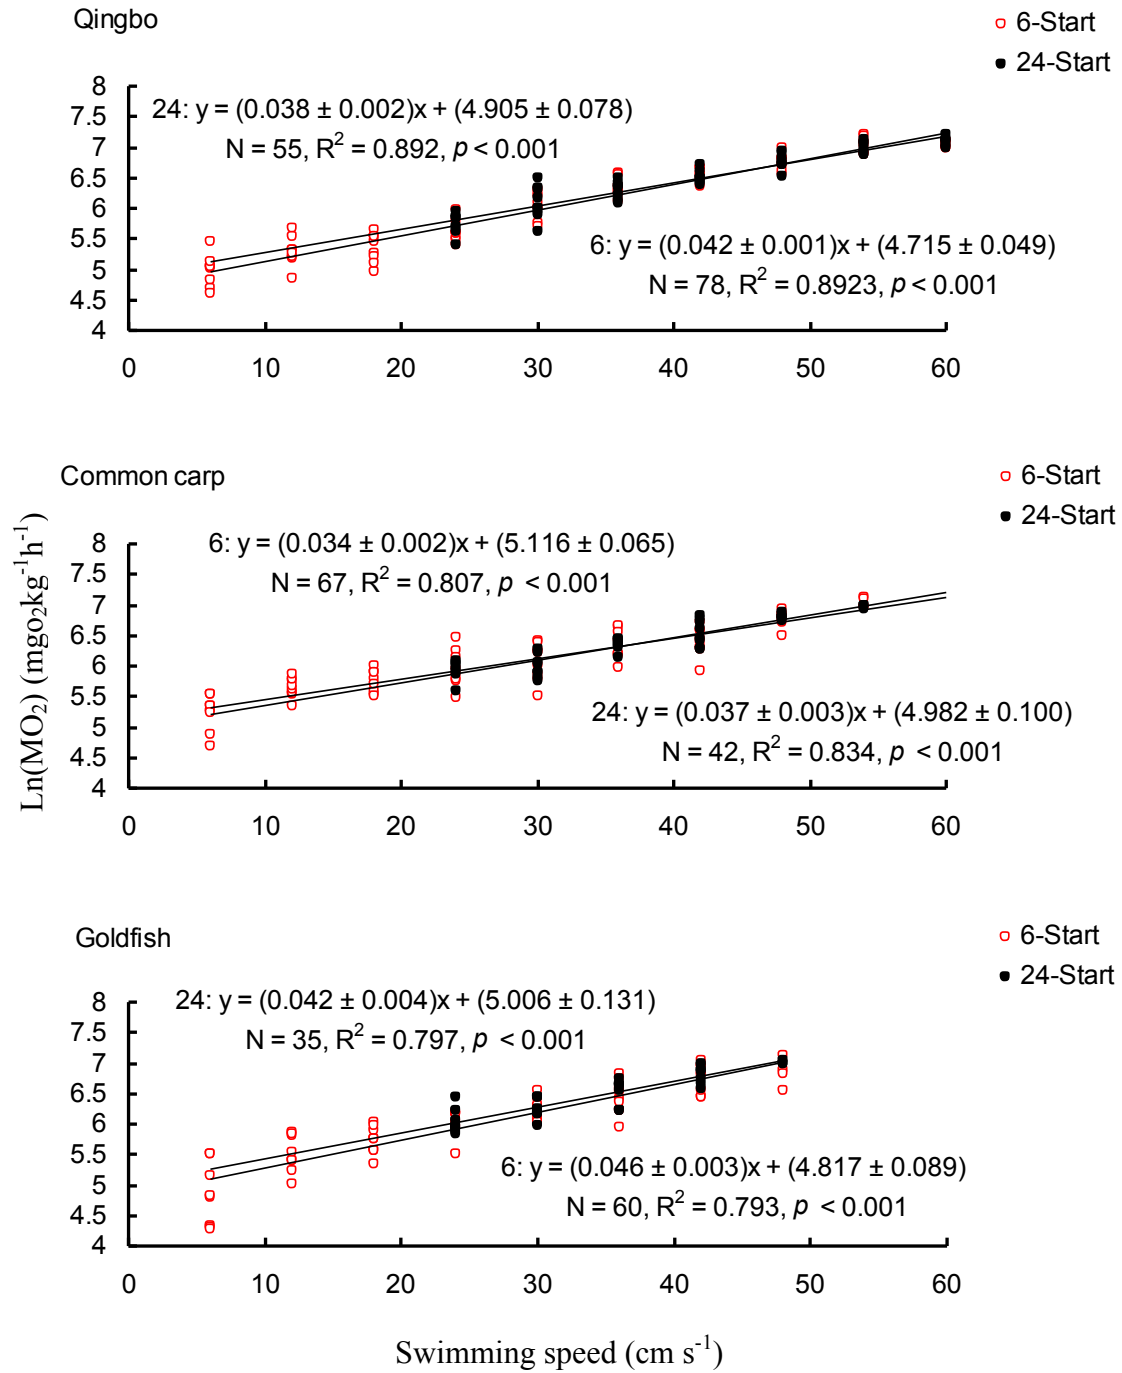

Fig. S3. The oxygen consumption rate of fish which start swimming at 24  $\text{cm s}^{-1}$  (filled circle ●;) and 6  $\text{cm s}^{-1}$  (open circle ○) of qingbo, common carp and goldfish.

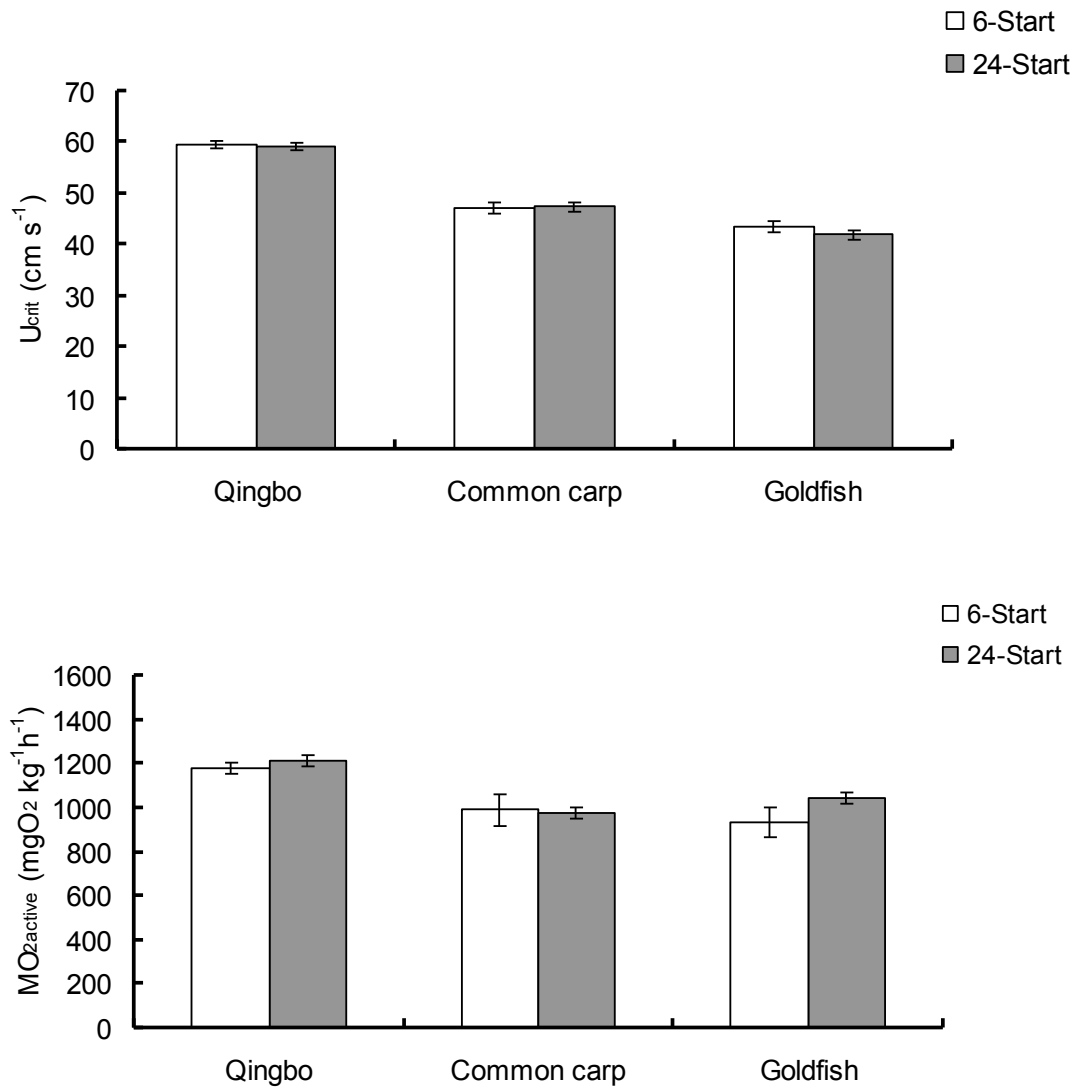

Fig. S4. The critical swimming speed and max metabolic rate of fish which start swimming at  $6 \text{ cm s}^{-1}$  (open bars  $\square$ ) and  $24 \text{ cm s}^{-1}$  (filled bars  $\blacksquare$ ) of qingbo, common carp and goldfish.



Table. S1 The effect of initial speed and anaesthesia on  $U_{crit}$  and  $MO_{2active}$ .

|             | Initial speed effect |                | Anaesthesia effect |                |
|-------------|----------------------|----------------|--------------------|----------------|
|             | $U_{crit}$           | $MO_{2active}$ | $U_{crit}$         | $MO_{2active}$ |
| Qingbo      | F=0.308              | F=0.950        | F=0.308            | F=0.938        |
|             | $p=0.587$            | $p=0.346$      | $p=0.587$          | $p=0.338$      |
| Common carp | F=0.068              | F=0.032        | F=0.068            | F=0.143        |
|             | $p=0.798$            | $p=0.861$      | $p=0.798$          | $p=0.711$      |
| Goldfish    | F=1.022              | F=2.079        | F=0.485            | F=2.828        |
|             | $p=0.329$            | $p=0.171$      | $p=0.497$          | $p=0.115$      |
